# Supplementary material for: Deep representation learning determines drug mechanism of action from cell painting images
Source: Royal Society of Chemistry journal article supplement (doi:10.1039/d3dd00060e), 2023-01-01

**a**

**JUMP1**

CP Embeddings in TSNE Space  
Colored by Perturbation

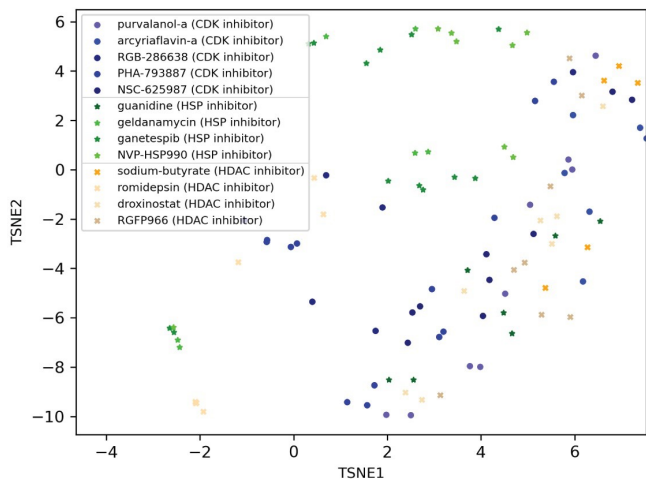

DP Embeddings in TSNE Space  
Colored by Perturbation

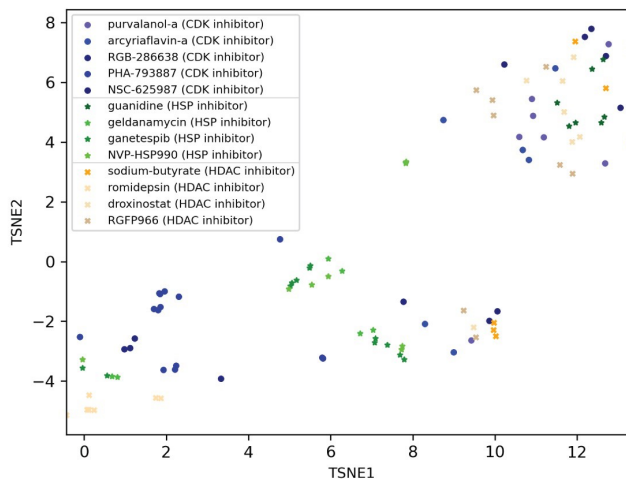

**b**

**LINCS**

CP Embeddings in TSNE Space  
Colored by Perturbation

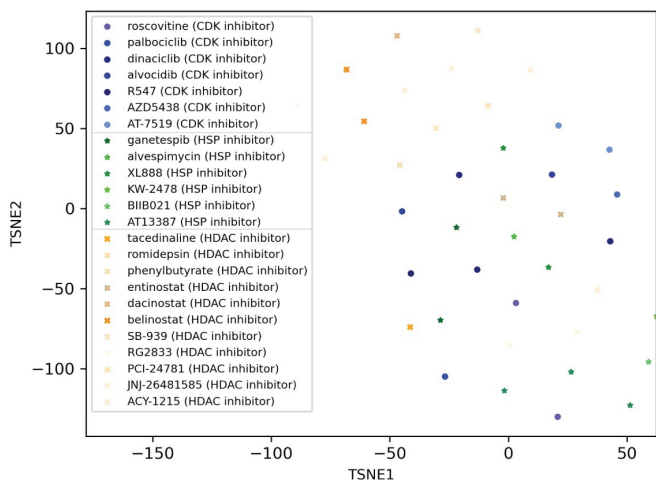

DP Embeddings in TSNE Space  
Colored by Perturbation

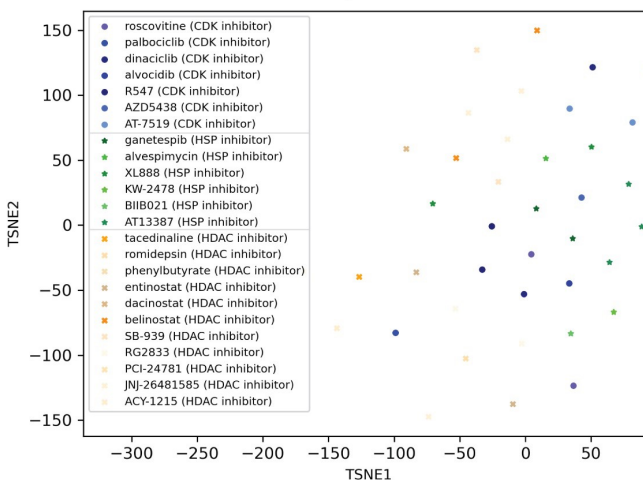

Supplement: d3dd00060e4.pdf [file d3dd00060e4.pdf]
