# Supplementary material for: Deep representation learning determines drug mechanism of action from cell painting images
Source: Royal Society of Chemistry journal article supplement (doi:10.1039/d3dd00060e), 2023-01-01

| MOA Profiler                                                                | Deep Profiler                                                                  |
|-----------------------------------------------------------------------------|--------------------------------------------------------------------------------|
| Does not require single cell locations                                      | Requires single cell locations                                                 |
| Training classification at field level                                      | Training classification at single-cell level                                   |
| gamma decay learning rate scheduler                                         | cosine learning rate scheduler                                                 |
| Strong supervision: classify MOAs, extract embeddings for MOA determination | Weak supervision: classify compounds, extract embeddings for MOA determination |
| No label smoothing                                                          | Label smoothing                                                                |

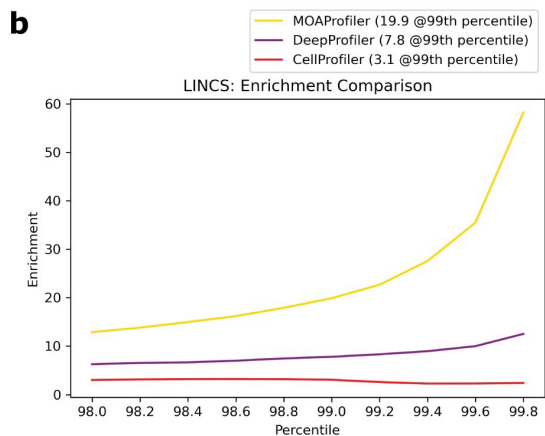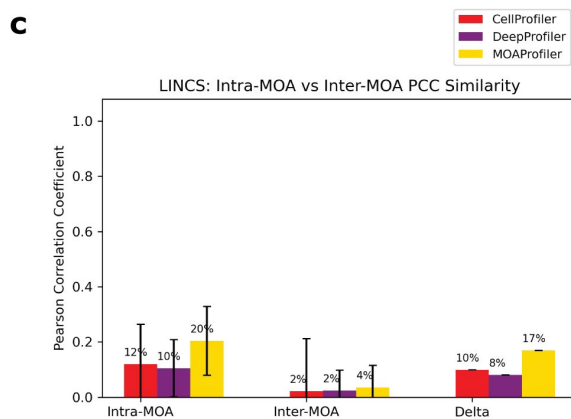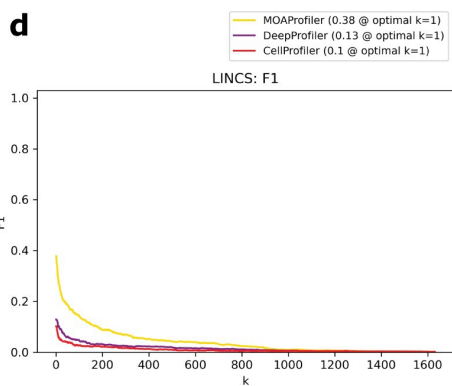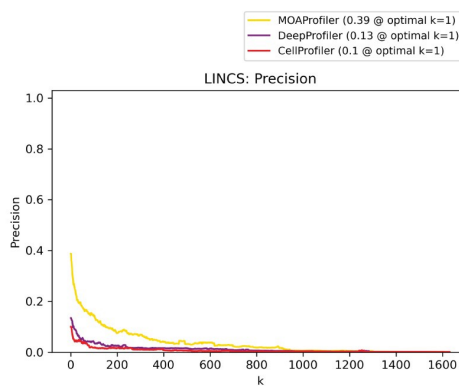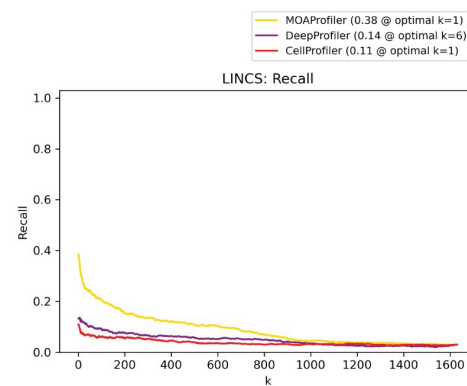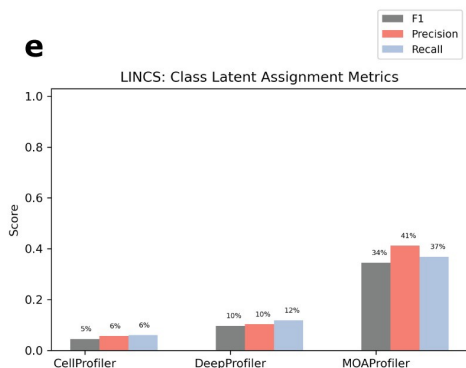

Supplement: d3dd00060e9.pdf [file d3dd00060e9.pdf]
