# Supplementary figures and images for: Deep representation learning determines drug mechanism of action from cell painting images
Source: Royal Society of Chemistry journal article supplement (doi:10.1039/d3dd00060e), 2023-01-01

**a**

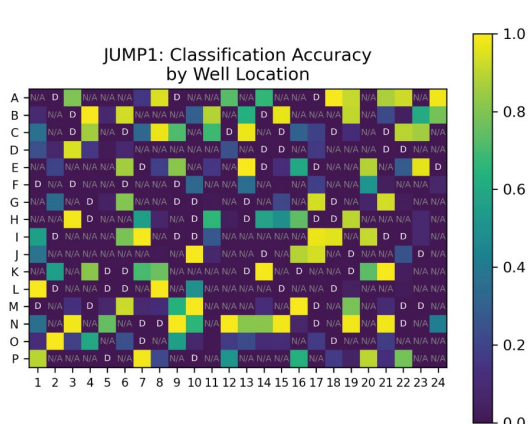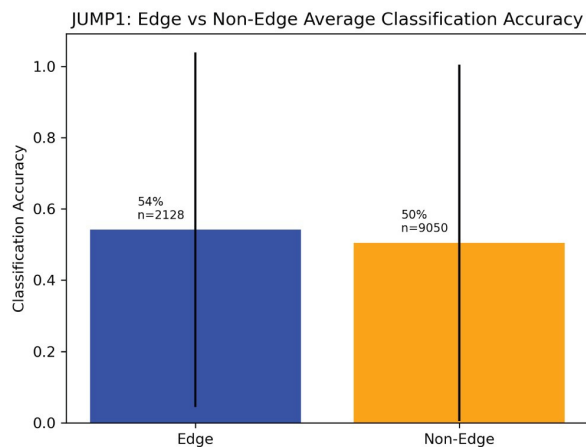

**b**

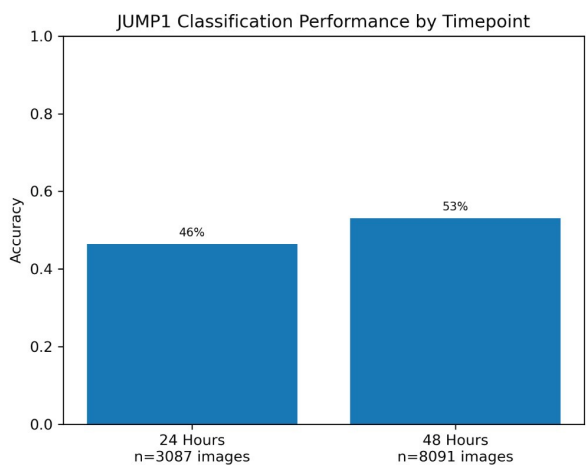

**c**

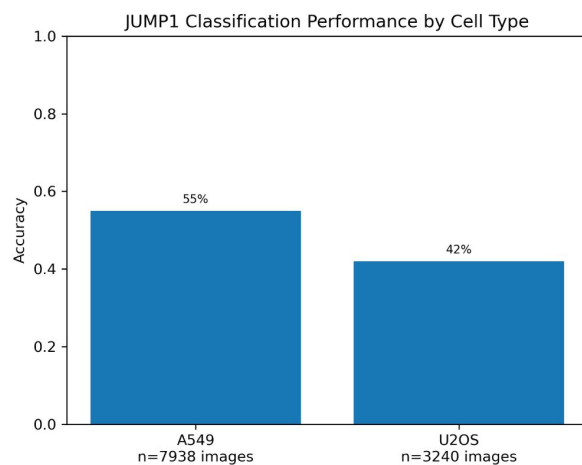

**d**

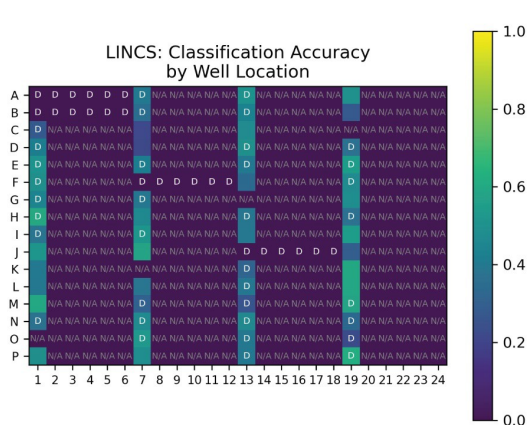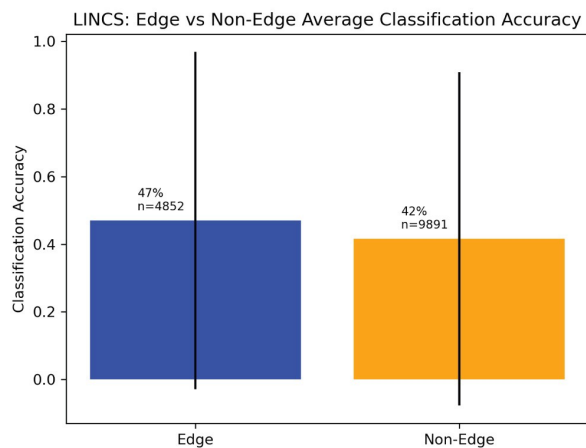

Supplement: d3dd00060e1.pdf [file d3dd00060e1.pdf]

**a**

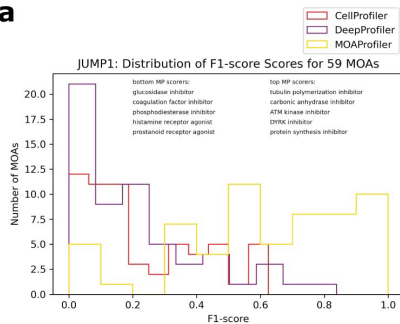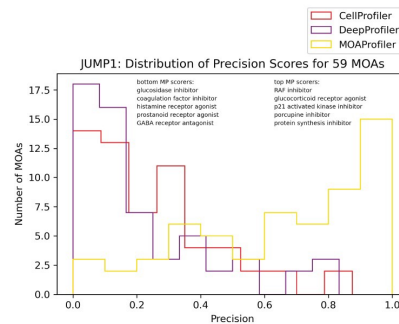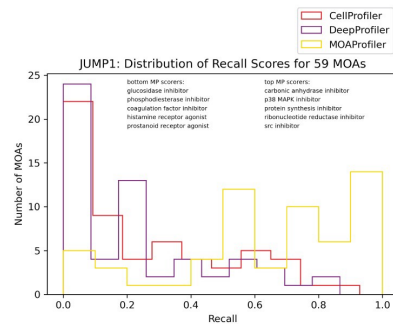

**b**

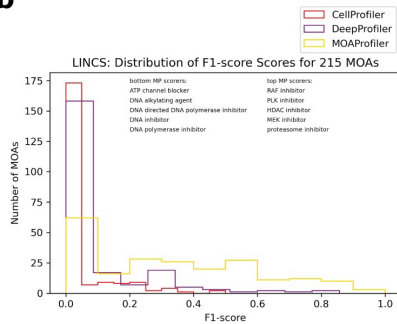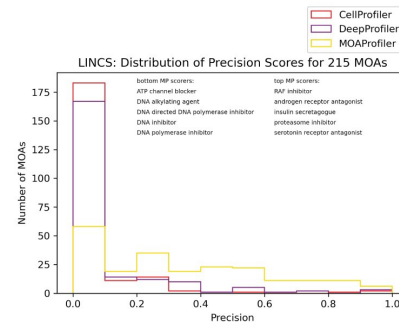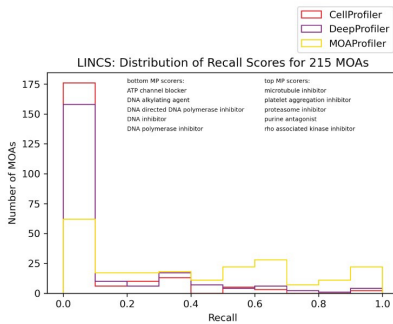

Supplement: d3dd00060e10.pdf [file d3dd00060e10.pdf]

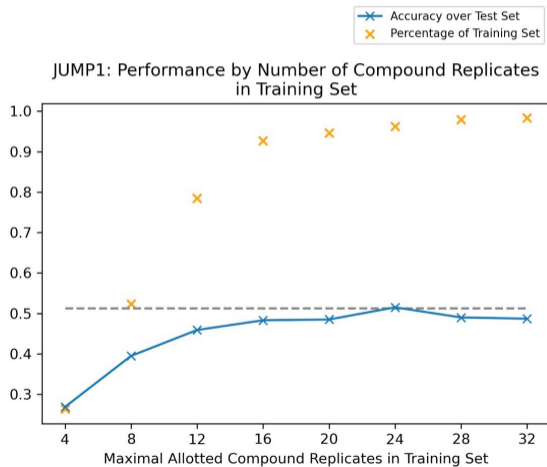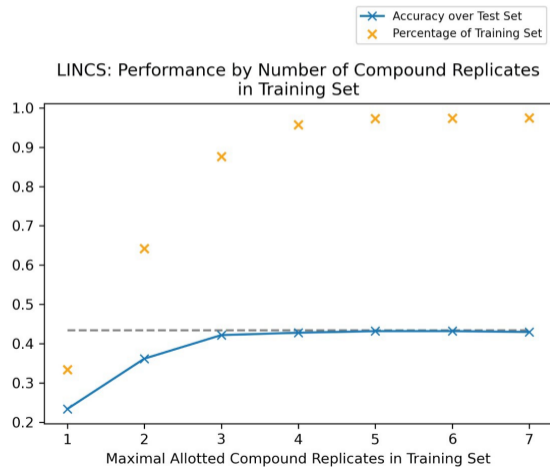

Supplement: d3dd00060e2.pdf [file d3dd00060e2.pdf]

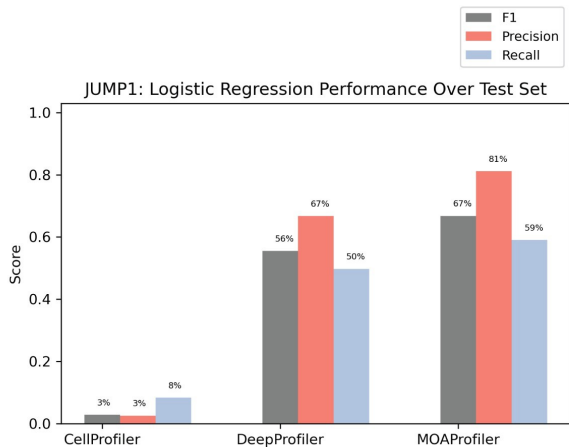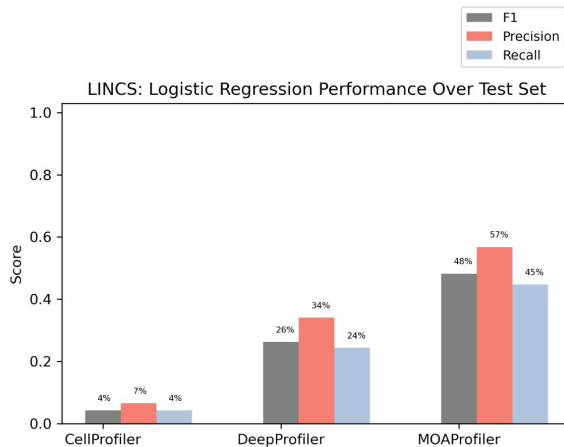

Supplement: d3dd00060e3.pdf [file d3dd00060e3.pdf]

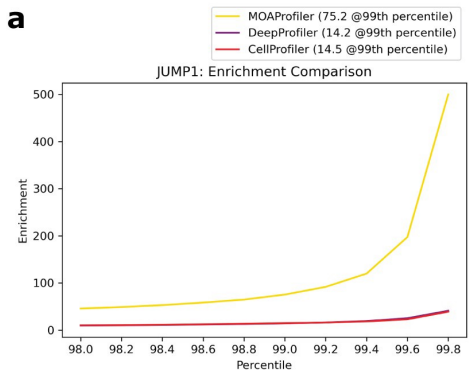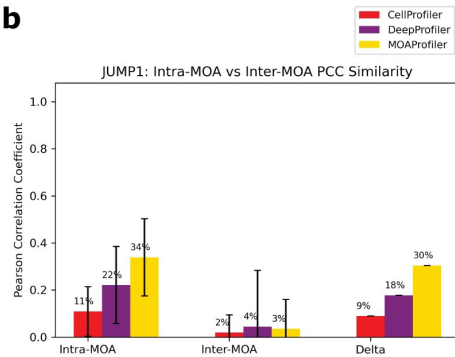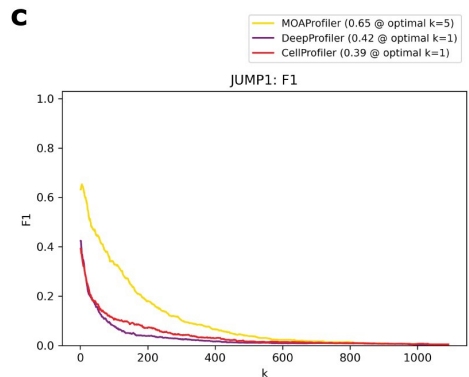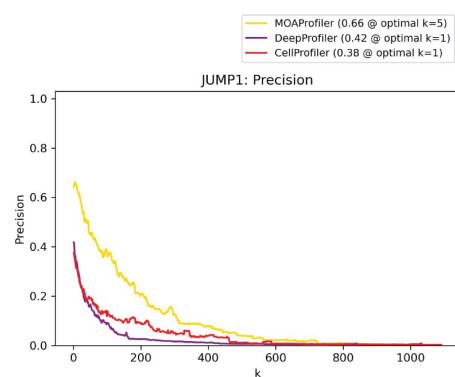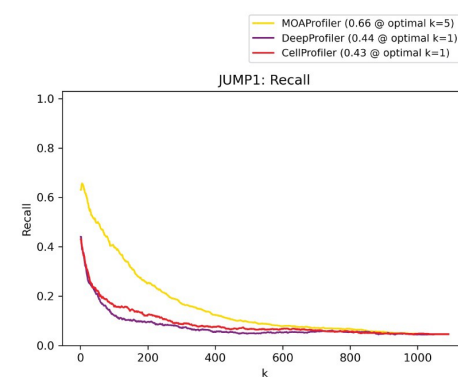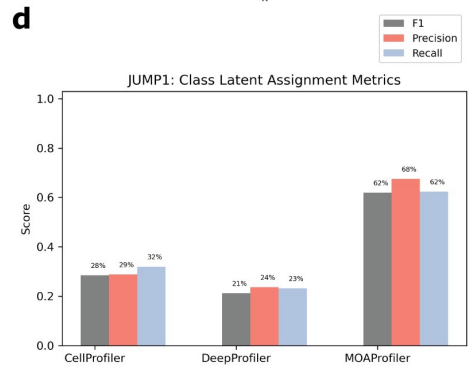

Supplement: d3dd00060e5.pdf [file d3dd00060e5.pdf]

**a**

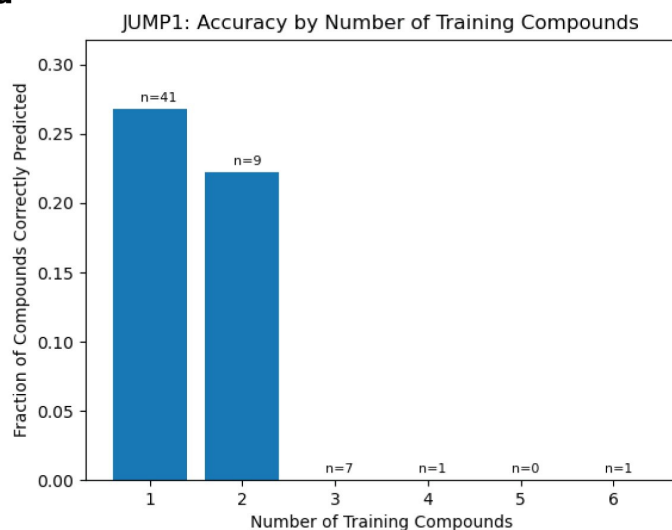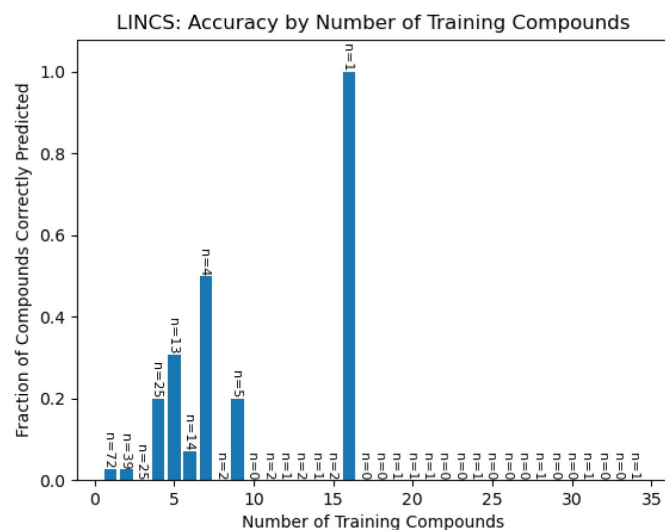

**b**

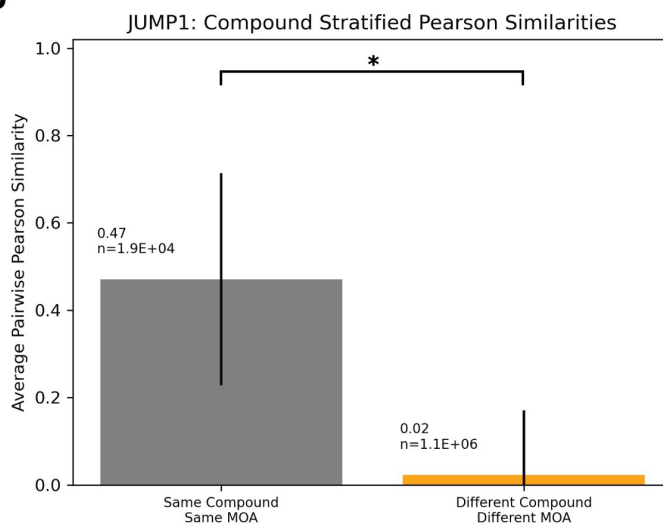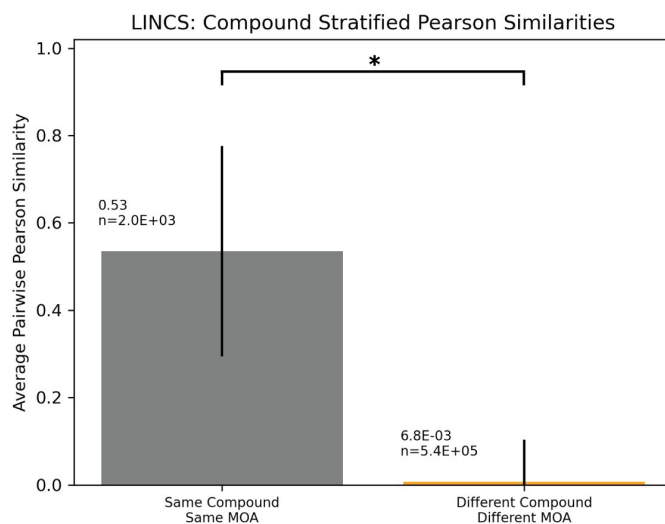

**c**

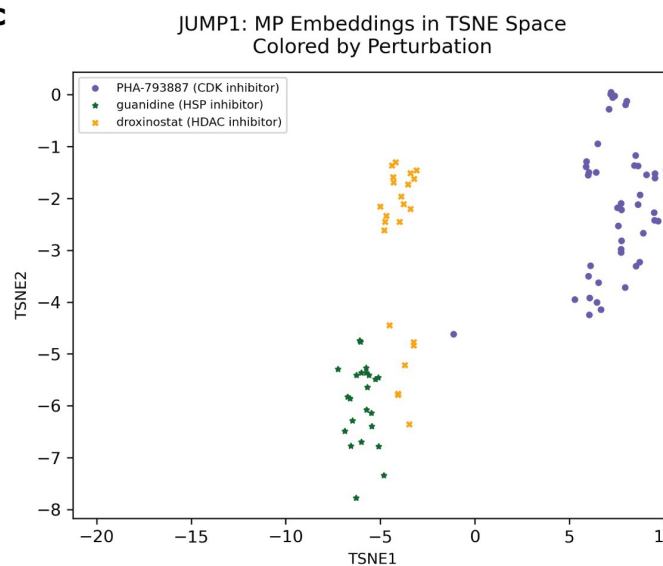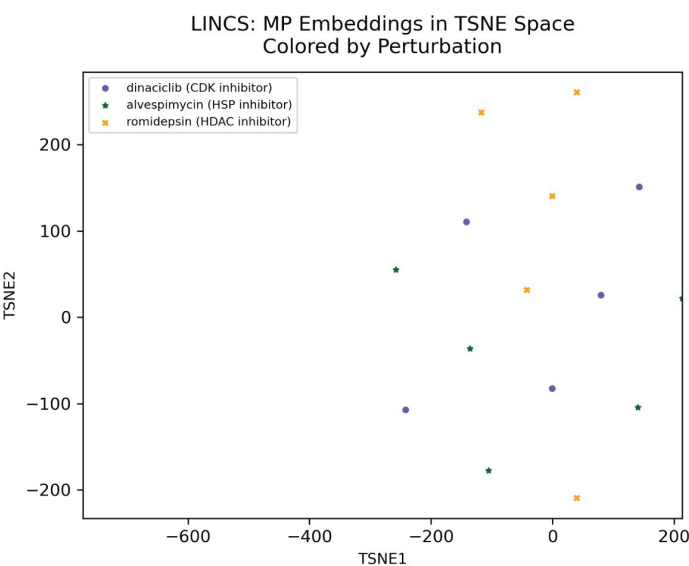

Supplement: d3dd00060e6.pdf [file d3dd00060e6.pdf]

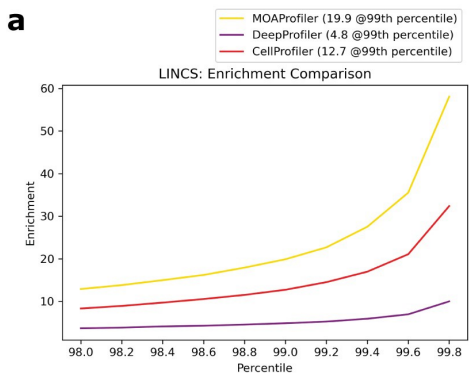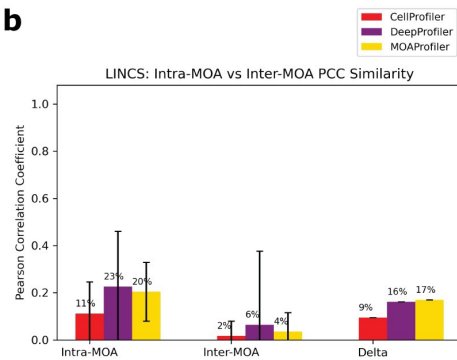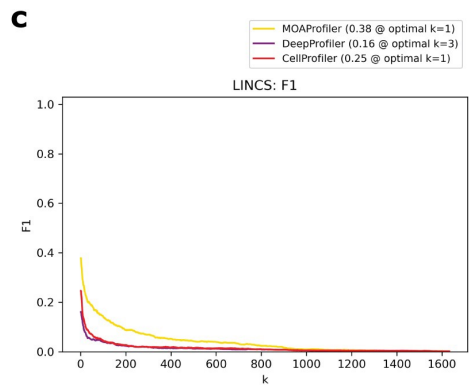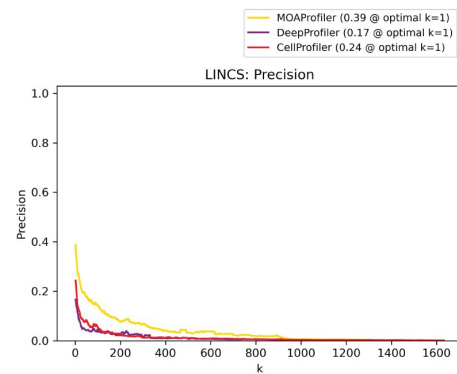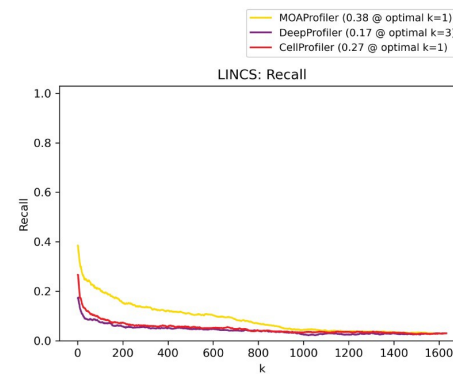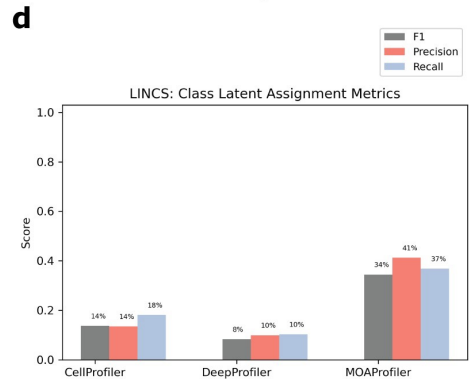

Supplement: d3dd00060e7.pdf [file d3dd00060e7.pdf]

**a**

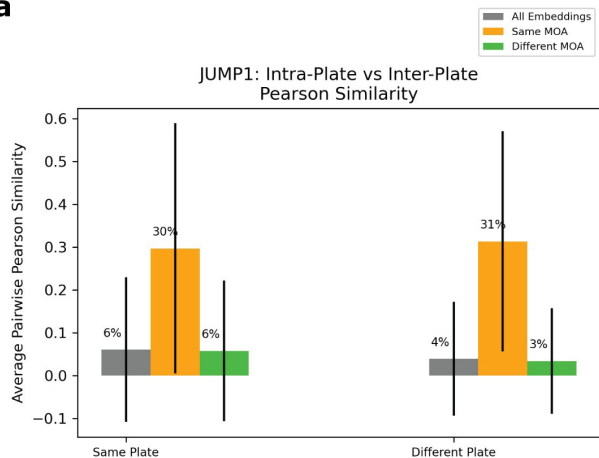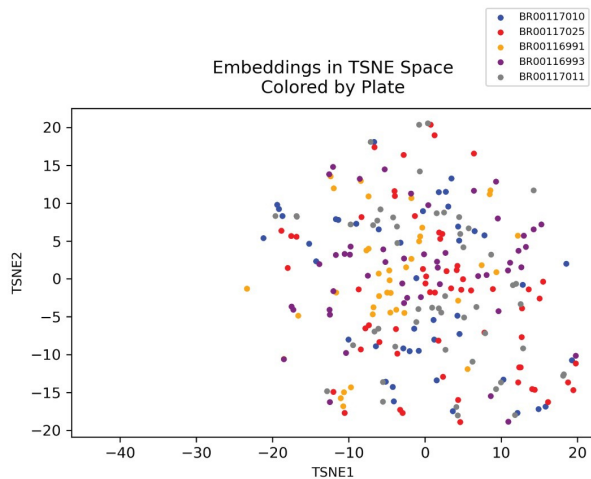

**b**

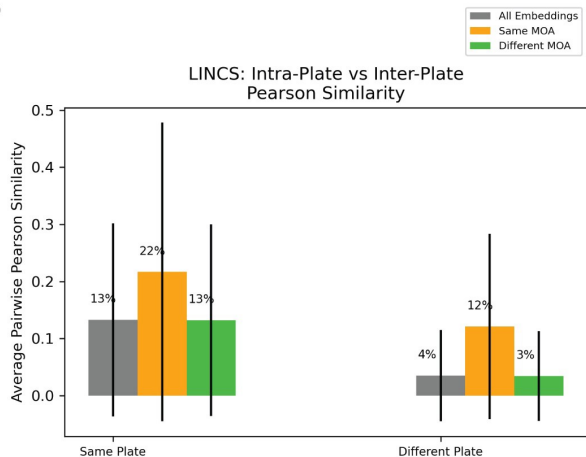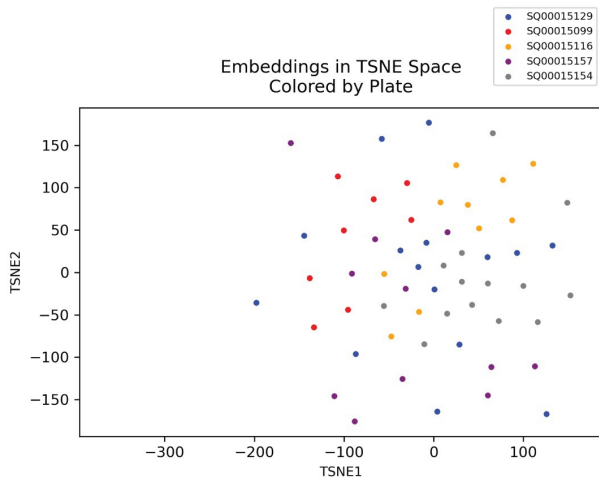

Supplement: d3dd00060e8.pdf [file d3dd00060e8.pdf]
